# Supplementary material for: Underestimating College Student Food Insecurity: Marginally Food Secure Students May Not Be Food Secure
Source: MDPI journal article supplement (doi:10.3390/nu14153142), 2022-07-29
Supplement: s1 [file s1]

**Table S1. Sample Representativeness of Undergraduate Student Population.**

|                           | Total N | Percent | Response N | Response Rate | Change  | Expected Sample Value | Difference (Expected - Observed) | Difference^2/ Expected | Chi-Square Value | P-Value | Cramers V |
|---------------------------|---------|---------|------------|---------------|---------|-----------------------|----------------------------------|------------------------|------------------|---------|-----------|
| <b>TOTAL</b>              | 34,596  |         | 6,823      | 19.72%        |         |                       |                                  |                        |                  |         |           |
| <b>Citizenship</b>        |         |         |            |               |         |                       |                                  |                        | 19.80            | 0.00    | 0.02      |
| US Citizen                | 29,447  | 85.12%  | 5,939      | 20.17%        | 0.45%   | 5808                  | -131                             | 2.98                   |                  |         |           |
| Permanent Resident        | 2,176   | 6.29%   | 401        | 18.43%        | -1.29%  | 429                   | 28                               | 1.85                   |                  |         |           |
| Foreign National          | 2,920   | 8.44%   | 483        | 16.54%        | -3.18%  | 576                   | 93                               | 14.98                  |                  |         |           |
| <b>Class Level: Total</b> |         |         |            |               |         |                       |                                  |                        | 104.18           | 0.00    | 0.05      |
| First Year                | 7,124   | 20.59%  | 1,702      | 23.89%        | 4.17%   | 1405                  | -297                             | 62.79                  |                  |         |           |
| Sophomore                 | 7,817   | 22.60%  | 1,566      | 20.03%        | 0.31%   | 1542                  | -24                              | 0.38                   |                  |         |           |
| Junior                    | 8,778   | 25.37%  | 1,705      | 19.42%        | -0.30%  | 1731                  | 26                               | 0.40                   |                  |         |           |
| Senior                    | 10,877  | 31.44%  | 1,850      | 17.01%        | -2.71%  | 2145                  | 295                              | 40.61                  |                  |         |           |
| <b>Gender</b>             |         |         |            |               |         |                       |                                  |                        | 685.32           | 0.00    | 0.14      |
| Female                    | 16,976  | 49.07%  | 4,429      | 26.09%        | 6.37%   | 3348                  | -1081                            | 349.04                 |                  |         |           |
| Male                      | 17,620  | 50.93%  | 2,394      | 13.59%        | -6.14%  | 3475                  | 1081                             | 336.28                 |                  |         |           |
| <b>School</b>             |         |         |            |               |         |                       |                                  |                        | 199.01           | 0.00    | 0.08      |
| School A                  | 183     | 0.53%   | 53         | 28.96%        | 9.24%   | 36                    | -17                              | 7.92                   |                  |         |           |
| School B                  | 863     | 2.49%   | 228        | 26.42%        | 6.70%   | 170                   | -58                              | 19.63                  |                  |         |           |
| School C                  | 788     | 2.28%   | 123        | 15.61%        | -4.11%  | 155                   | 32                               | 6.76                   |                  |         |           |
| School D                  | 3,776   | 10.91%  | 700        | 18.54%        | -1.18%  | 745                   | 45                               | 2.68                   |                  |         |           |
| School E                  | 264     | 0.76%   | 67         | 25.38%        | 5.66%   | 52                    | -15                              | 4.28                   |                  |         |           |
| School F                  | 21,043  | 60.82%  | 3,910      | 18.58%        | -1.14%  | 4150                  | 240                              | 13.89                  |                  |         |           |
| School G                  | 3,857   | 11.15%  | 732        | 18.98%        | -0.74%  | 761                   | 29                               | 1.08                   |                  |         |           |
| School H                  | 3,422   | 9.89%   | 967        | 28.26%        | 8.54%   | 675                   | -292                             | 126.44                 |                  |         |           |
| School I                  | 400     | 1.16%   | 43         | 10.75%        | -8.97%  | 79                    | 36                               | 16.33                  |                  |         |           |
| <b>Full/ Part Time</b>    |         |         |            |               |         |                       |                                  |                        | 83.54            | 0.00    | 0.05      |
| Full Time                 | 33,083  | 95.63%  | 6,679      | 20.19%        | 0.47%   | 6525                  | -154                             | 3.65                   |                  |         |           |
| Part Time                 | 1,513   | 4.37%   | 144        | 9.52%         | -10.20% | 298                   | 154                              | 79.89                  |                  |         |           |
| <b>Race/Ethnicity</b>     |         |         |            |               |         |                       |                                  |                        | 3.75             | 0.44    | 0.01      |
| African American          | 2,559   | 7.40%   | 515        | 20.13%        | 0.40%   | 505                   | -10                              | 0.21                   |                  |         |           |
| Asian                     | 11,707  | 33.84%  | 2259       | 19.30%        | -0.43%  | 2309                  | 50                               | 1.08                   |                  |         |           |
| Hispanic                  | 4,577   | 13.23%  | 944        | 20.62%        | 0.90%   | 903                   | -41                              | 1.89                   |                  |         |           |
| White                     | 13,984  | 40.42%  | 2743       | 19.62%        | -0.11%  | 2758                  | 15                               | 0.08                   |                  |         |           |
| Other                     | 1,769   | 5.11%   | 362        | 20.46%        | 0.74%   | 349                   | -13                              | 0.49                   |                  |         |           |
| <b>Financial Aid</b>      |         |         |            |               |         |                       |                                  |                        |                  |         |           |
| Pell                      | 11,946  | 34.53%  | 2,571      | 21.52%        | 1.80%   | 2356                  | -215                             | 19.62                  | 29.97            | 0.00    | 0.03      |
| No Pell                   | 22,650  | 65.47%  | 4,252      | 18.77%        | -0.95%  | 4467                  | 215                              | 10.35                  |                  |         |           |
| Any Financial Aid         | 26,182  | 75.68%  | 5,493      | 20.98%        | 1.26%   | 5164                  | -329                             | 21.01                  | 86.40            | 0.00    | 0.05      |
| No Financial Aid          | 8,414   | 24.32%  | 1,330      | 15.81%        | -3.91%  | 1659                  | 329                              | 65.39                  |                  |         |           |

*Note.* Individual schools within the University are labeled alphabetically to protect the identity of the institution. The race category 'Other' includes American Indian, Other, Two or More and Unknown. Federal Pell Grant data reported in this table was provided by the Office of Institutional Research, but this data was not available at the individual student level. Self-report data on Pell Grant status was also collected and used in analyses.
