# Supplementary material for: Underestimating College Student Food Insecurity: Marginally Food Secure Students May Not Be Food Secure
Source: MDPI journal article supplement (doi:10.3390/nu14153142), 2022-07-29
Supplement: s1 [file s1]

## Survey Questions Used to Describe the Sample<sup>1</sup> and Used in Multinomial Logistic Regression

### **LEVEL OF FOOD SECURITY (USDA 10-Item Food Security Survey Module):**

*Thinking about the last 30 days, how true would you say the following statements are?*

**I was worried whether my food would run out before I had money to buy more.**

- ☐ **Often True (1)**
- ☐ **Sometimes True (2)**
- ☐ **Never True (3)**
- ☐ **I don't know (4)**

**The food that I bought just didn't last, and I didn't have money to get more.**

- ☐ **Often True (1)**
- ☐ **Sometimes True (2)**
- ☐ **Never True (3)**
- ☐ **I don't know (4)**

**I couldn't afford to eat balanced meals.**

- ☐ **Often True (1)**
- ☐ **Sometimes True (2)**
- ☐ **Never True (3)**
- ☐ **I don't know (4)**

*Display This Question:*

*If I was worried whether my food would run out before I had money to buy more.      Never True Is Not Selected*

*Or The food that I bought just didn't last, and I didn't have money to get more.      Never True Is Not Selected*

---

<sup>1</sup> Other items used to describe the student sample including age, citizenship, enrollment status, first generation college student, race, and cumulative GPA were provided by the intuition's Office of Institutional Research.

*Or I couldn't afford to eat balanced meals. Never True Is Not Selected*

**In the last 30 days, did you ever cut the size of your meals or skip meals because there wasn't enough money for food?**

- ☐ **Yes (1)**
- ☐ **No (2)**
- ☐ **I don't know (3)**

*Display This Question:*

*If In the last 30 days, did you ever cut the size of your meals or skip meals because there wasn't enough money for food? Yes Is Selected*

**How many of the last 30 days did you cut the size of your meals or skip meals because there wasn't enough money for food? [OPEN]**

*Display This Question:*

*If I was worried whether my food would run out before I had money to buy more. Never True Is Not Selected*

*Or The food that I bought just didn't last, and I didn't have money to get more. Never True Is Not Selected*

*Or I couldn't afford to eat balanced meals. Never True Is Not Selected*

**In the last 30 days, did you ever eat less than you felt you should because there wasn't enough money for food?**

- ☐ **Yes (1)**
- ☐ **No (2)**
- ☐ **I don't know (3)**

*Display This Question:*

*If I was worried whether my food would run out before I had money to buy more. Never True Is Not Selected*

*Or The food that I bought just didn't last, and I didn't have money to get more. Never True Is Not Selected*

*Or I couldn't afford to eat balanced meals. Never True Is Not Selected*

**In the last 30 days, were you ever hungry but didn't eat because there wasn't enough money for food?**

- ☐ **Yes (1)**
- ☐ **No (2)**
- ☐ **I don't know (3)**

*Display This Question:*

*If I was worried whether my food would run out before I had money to buy more.      Never True Is Not Selected*

*Or I couldn't afford to eat balanced meals. Never True Is Not Selected*

*Or The food that I bought just didn't last, and I didn't have money to get more. Never True Is Not Selected*

**In the last 30 days, did you lose weight because there wasn't enough money for food?**

- ☐ **Yes (1)**
- ☐ **No (2)**
- ☐ **I don't know (3)**

*Display This Question:*

*If I was worried whether my food would run out before I had money to buy more.      Never True Is Not Selected*

*Or The food that I bought just didn't last, and I didn't have money to get more. Never True Is Not Selected*

*Or I couldn't afford to eat balanced meals. Never True Is Not Selected*

**In the last 30 days, did you ever not eat for a whole day because there wasn't enough money for food?**

- ☐ **Yes (1)**
- ☐ **No (2)**
- ☐ **I don't know (3)**

*Display This Question:*

*If In the last 30 days, did you ever not eat for a whole day because there wasn't enough money for food?  
Yes Is Selected*

**For how many of the last 30 days did you not eat for a whole day because there wasn't enough money for food? [OPEN ENDED]**

#### **MECHANISMS OF FINANCING EDUCATION**

**In which of the following ways did you pay for the expenses associated with attending college this semester? This includes tuition, fees and living expenses. Please check all that apply.**

- ☐ I get help from my family
- ☐ I take out student loans
- ☐ I have a scholarship
- ☐ I have a Teaching Assistantship (TA) or Graduate Assistantship (GA)
- ☐ I have a work-study job
- ☐ I have a job that isn't a work study job, TA or GA
- ☐ I have a fellowship
- ☐ I get a Pell Grant
- ☐ I get a grant other than a Pell grant from the federal or state government
- ☐ I get a grant from a government other than the US government
- ☐ I get a grant from (institution name)
- ☐ I use my savings
- ☐ I use my credit cards
- ☐ I get help from friends
- ☐ My employer pays
- ☐ Other, please explain \_\_\_\_\_

**Survey Questions Used to Describe the Sample that Were Not Included in the Multinomial Logistic Regression**

**Have you heard about the (institution name) Food Pantry, a pantry that provides food for students in need?**

- ☐ **No (1)**
- ☐ **Yes (2)**
- ☐ **I am not sure (3)**

*Display This Question:*

*If Have you heard about the (institution name) Food Pantry, a pantry that provides food for stu... Yes Is Selected*

**During the current semester, have you received food from the (institution name) Food Pantry?**

- ☐ **Yes (1)**
- ☐ **No (2)**

**During the current semester, have you received food from an off-campus food pantry?**

- ☐ **Yes (1)**
- ☐ **No (2)**

**Do you have a (institution name) meal plan for Fall 2016 semester?**

- ☐ **Yes (1)**
- ☐ **No (2)**

**Please indicate any federal, state, or local assistance you may have received over the past 12 months. Check all that apply.**

- ☐ **I do not receive any kind of federal, state or local assistance. (1)**
- ☐ **SNAP (food stamps) (2)**
- ☐ **WIC (nutritional assistance for pregnant women and children) (3)**
- ☐ **TANF (public cash assistance; formerly called ADC or ADFC) (4)**
- ☐ **SSI (supplemental security income) (5)**

- ☐ **SSDI (social security disability income) (6)**
- ☐ **Medicaid or Public health insurance (7)**
- ☐ **Child care assistance (8)**
- ☐ **Unemployment compensation/insurance (9)**
- ☐ **Utility assistance (10)**
- ☐ **Housing assistance (11)**
- ☐ **Transportation assistance (12)**
- ☐ **Tax rebates or tax credits (13)**
- ☐ **Veterans benefits (Veteran's Administration benefits for a servicemen's, widow's, or survivor's pension, service disability or the GI bill (14)**
